# Supplementary material for: Perioperative blood transfusion is associated with a gene transcription profile characteristic of immunosuppression: a prospective cohort study
Source: PubMed Central journal article supplement (PMC4201915; doi:10.1186/s13054-014-0541-x), 2014-10-01
Supplement: 13054_2014_541_MOESM1_ESM.pdf [file 13054_2014_541_MOESM1_ESM.pdf]

## Antibiotic prophylaxis for GI surgery in Adults

- Colorectal surgery
- Appendicectomy
- Upper gastrointestinal surgery
- Open biliary surgery
- Laparoscopic procedures in high-risk patients
- Pancreatic and liver surgery
- Open or laparoscopic surgery with mesh (eg gastric band / rectopexy) – consider antibiotic prophylaxis in high-risk patients
- Hernia repair with or without mesh – SIGN guidance does not recommend antibiotic prophylaxis

Antibiotic prophylaxis is a commonly used method of reducing the incidence and impact of surgical site infections in a wide range of procedures. **Patients already on antibiotic treatment for intra-abdominal infection DO NOT require additional prophylaxis.**

**Patients with current or previous infection or colonisation with resistant organisms may require alternative prophylaxis;** please contact Microbiology to discuss.

**A single (STAT) dose of antibiotic prophylaxis should be written on the STAT side of the inpatient chart. This should be administered at induction of anaesthesia.**

**In prolonged procedures (>4 hours) or where there is significant blood loss a second dose may be considered.**

**Cefuroxime IV 1.5g**

**PLUS**

**Metronidazole IV 500mg**

For biliary surgery in the presence of stents, or pancreaticoduodenectomy, **ADD**

**Gentamicin IV 2mg/kg, maximum dose 160mg**

**Cefuroxime** will be restricted to theatres, and should **NOT** be continued for treatment of infection.

Alternative for patients with Type 1 penicillin allergy:

**Gentamicin IV 2mg/kg, maximum dose 160mg**

**PLUS**

**Metronidazole IV 500mg**

**MRSA status MUST be checked prior to surgery.**

For patients known to be currently or previously MRSA positive, **ADD to the above prophylaxis:**

**Teicoplanin IV 800mg STAT**

If there is pus found in the abdomen, an acutely inflamed appendix, or bowel perforation has occurred, institute a therapeutic course of antibiotics **as per treatment guidelines** for intra-abdominal sepsis.

References:

1. National SIGN guidelines on antibiotic prophylaxis in surgery (2008). <http://www.sign.ac.uk/pdf/sign104.pdf>
2. *Antibacterial prophylaxis in surgery: 1 – Gastrointestinal and biliary surgery*. DTB 2003;41:83-86
